# Supplementary material for: Detection and Magnetic Source Imaging of Fast Oscillations (40–160 Hz) Recorded with Magnetoencephalography in Focal Epilepsy Patients
Source: Springer Nature journal article supplement (doi:10.1007/s10548-016-0471-9), 2016-01-30
Supplement: MOESM2 [file 8837326]

**Supplementary Table I:** Clinical Information.

| <b>Patient</b> | <b>Surgery</b>                                                   | <b>Outcome</b>                                                            | <b>iEEG Interictal</b>                                                                                                                     | <b>iEEG Ictal</b>                                                                                            | <b>Scalp Interictal</b>                                                | <b>Scalp Ictal</b>                 | <b>MRI</b>                                                                                           |
|----------------|------------------------------------------------------------------|---------------------------------------------------------------------------|--------------------------------------------------------------------------------------------------------------------------------------------|--------------------------------------------------------------------------------------------------------------|------------------------------------------------------------------------|------------------------------------|------------------------------------------------------------------------------------------------------|
| <b>1</b>       | Right orbitofrontal resection                                    | Engel I                                                                   | Right orbitofrontal                                                                                                                        | Right orbitofrontal                                                                                          | Right fronto-temporal and frontal                                      | Right fronto-polar and frontal     | Right orbitofrontal focal cortical dysplasia                                                         |
| <b>2</b>       | Palliative mini-invasive surgery                                 | Engel III after first procedure, only one month FU after second procedure | 3 independent regions: 1) post. insula involving temporal neocortex, 2) left occipital pole and supracalcarine region, 3) left hippocampus | Supracalcarine electrodes and post. insula                                                                   | Widespread left temporo-parietal maximum at T7-P7                      | Left temporo-parietal              | Multifocal nodular heterotopia involving the left posterior temporal, parietal and occipital regions |
| <b>3</b>       | n.a.                                                             | not operated, not seizure-free                                            | n.a.                                                                                                                                       | n.a.                                                                                                         | Left temporal, Involving anterior and posterior temporal               | Left posterior temporal            | Non lesional                                                                                         |
| <b>4</b>       | Right temporal resection with further extension of the resection | Engel III                                                                 | n.a.                                                                                                                                       | n.a.                                                                                                         | Left temporo-parietal                                                  | Right centro-temporal-parietal     | Right temporo-parietal heterotopia                                                                   |
| <b>5</b>       | n.a.                                                             | Not operated, not seizure-free                                            | Interictal activity involving both frontal lobes, more often over the right frontal regions                                                | Ill defined, Very widespread right frontal generator, ictal activity at times starting from the left frontal | Frontal atypical spike and wave discharges more prominent on the right | Bilateral frontal maximum at right | Right frontal focal cortical dysplasia                                                               |

|           |                                          |                                            |                                                                                | regions                                                              |                                           |                                    |                                                   |
|-----------|------------------------------------------|--------------------------------------------|--------------------------------------------------------------------------------|----------------------------------------------------------------------|-------------------------------------------|------------------------------------|---------------------------------------------------|
| <b>6</b>  | n.a.                                     | Not operated, seizure free with medication | n.a.                                                                           | n.a.                                                                 | Left posterior quadrant, maximum P3       | left posterior parietal maximum P3 | Left posterior quadrant atrophy                   |
| <b>7</b>  | n.a.                                     | not operated, not seizure-free             | Bilateral mesial temporal                                                      | Bilateral mesial temporal                                            | Bilateral temporal                        | Bilateral temporal                 | Left hippocampal atrophy                          |
| <b>8</b>  | Left frontal resection                   | Engel III                                  | Bilateral frontal, max in the lesion and perilesional                          | Bilateral frontal, max in the lesion and perilesional                | Bilateral fronto-central maximum left     | Left mid frontal                   | Left frontal focal cortical dysplasia             |
| <b>9</b>  | Right posterior quadrant resection       | Engel II                                   | Widespread discharges over the right posterior, parietal and occipital regions | Ill defined, over the right posterior parietal and occipital regions | widespread over the right hemisphere      | Right posterior quadrant           | Right posterior quadrant focal cortical dysplasia |
| <b>10</b> | Right frontal resection                  | Engel II                                   | Right fronto-temporal                                                          | Right orbitofrontal                                                  | Anterior head regions                     | Bilateral frontal maximum right    | Right frontal focal cortical dysplasia            |
| <b>11</b> | Right selective amygdalo-hippocampectomy | No updated follow-up information available | n.a.                                                                           | n.a.                                                                 | Right temporal                            | Right temporal                     | Right hippocampal atrophy                         |
| <b>12</b> | n.a.                                     | not seizure-free                           | n.a.                                                                           | n.a.                                                                 | Bilateral posterior quadrant maximum left | Bilateral maximum left             | Left posterior quadrant focal cortical dysplasia  |
| <b>13</b> | Right temporal resection                 | Engel I                                    | n.a.                                                                           | n.a.                                                                 | Right temporal                            | n.a.                               | Right hippocampal atrophy                         |

|           |                                                                  |                                                |                                                     |                                   |                                        |                      |                                                                                        |
|-----------|------------------------------------------------------------------|------------------------------------------------|-----------------------------------------------------|-----------------------------------|----------------------------------------|----------------------|----------------------------------------------------------------------------------------|
| <b>14</b> | Left amygdalo hippocampectomy followed by extension of resection | No follow-up info after second surgery in 2012 | Left mesial temporal                                | Left hippocampus                  | Left temporal                          | Left fronto-temporal | Non lesional                                                                           |
| <b>15</b> | Right temporal resection sparing the hippocampus                 | Engel II                                       | Bilateral mesial temporal                           | Bilateral temporal maximum right. | Right frontotemporal and Left temporal | Right temporal       | Bilateral hippocampal atrophy                                                          |
| <b>16</b> | Left orbitofrontal resection                                     | Engel I                                        | Left insular, orbitofrontal, temporal and opercular | Left Orbitofrontal                | Left fronto-temporal.                  | Left temporal        | Left orbitofrontal focal cortical dysplasia                                            |
| <b>17</b> | Right selective amygdalo-hippocampectomy                         | Engel I                                        | n.a.                                                | n.a.                              | Right temporal.                        | Right temporal       | Right hippocampal atrophy and gliosis. Left middle cranial fossa meningoencephalocele. |
